# Supplementary material for: Dendrite-like Co3O4 nanostructure and its applications in sensors, supercapacitors and catalysis
Source: Royal Society of Chemistry journal article supplement (doi:10.1039/c2dt12494g), 2012-01-01
Supplement: c2dt12494g.pdf [file c2dt12494g.pdf]

## Electronic Supporting Information (ESI)

### Dendrite-like $\text{Co}_3\text{O}_4$ nanostructure and its applications in sensors, supercapacitors and catalysis

Huan Pang, Feng Gao, Qun Chen, Rongmei Liu, Qingyi Lu

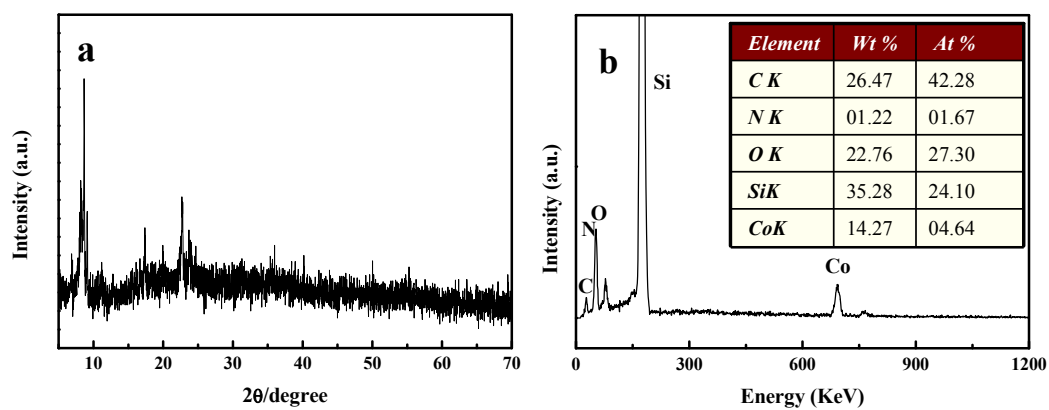

Fig. S1 (a) XRD pattern and (b) EDS pattern of the nanostructured metal-organic precursor.

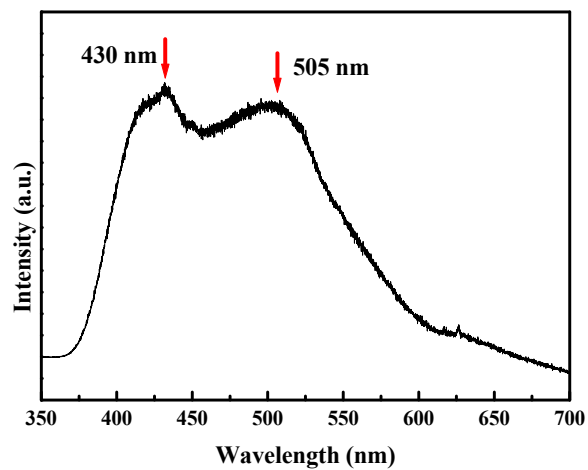

Fig. S2 Room-temperature PL spectrum of the nanostructured metal-organic precursor.

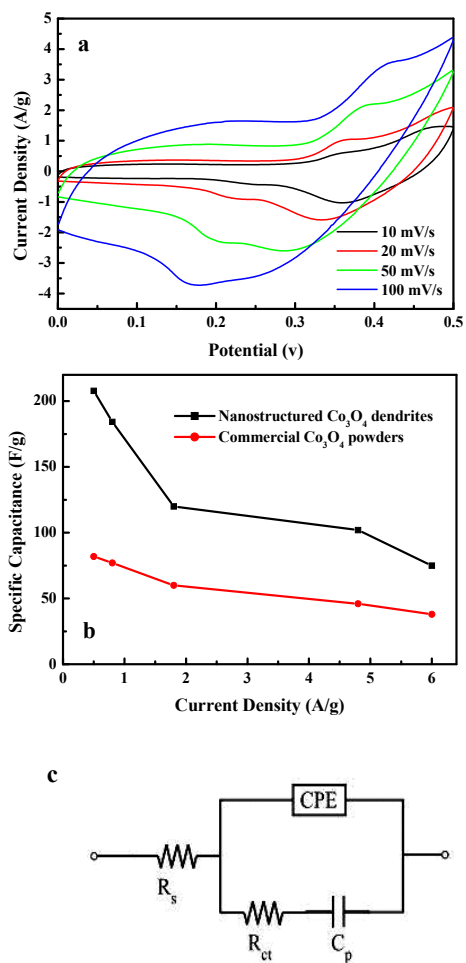

Fig. S3 (a) CV curves of the Co<sub>3</sub>O<sub>4</sub> dendrite-electrode in KOH solution (3 M) at different scan rates; (b) The specific capacitances derived from the discharging curves at different discharge rates; (c) Equivalent circuit for the simulation of the impedance spectra shown in Figure 4d.

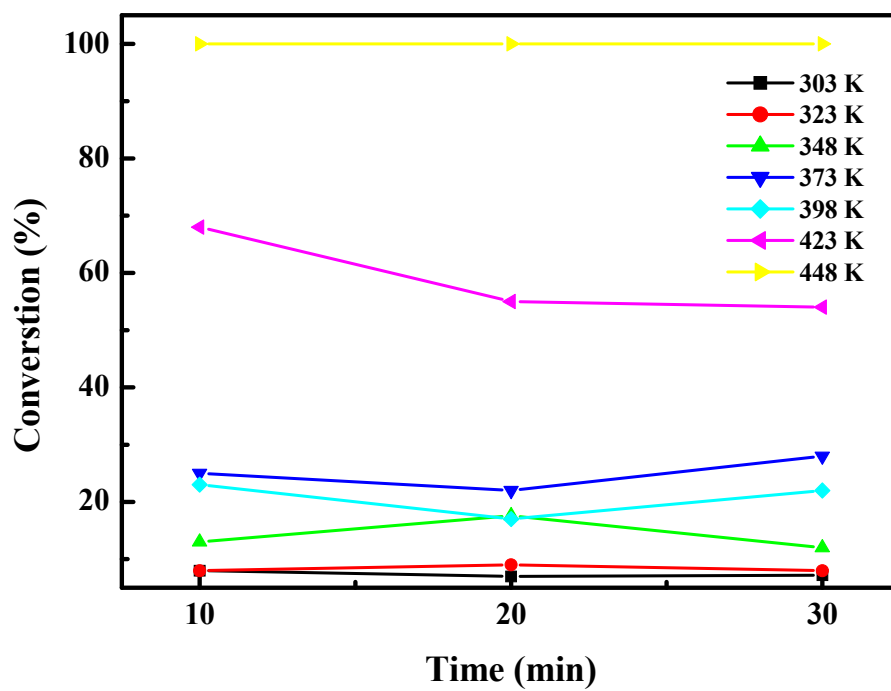

Fig. S4 CO conversion efficiencies of the commercial  $\text{Co}_3\text{O}_4$  powders at different temperatures.
